# Supplementary material for: Strengthening Structures in the Petiole–Lamina Junction of Peltate Leaves
Source: MDPI journal article supplement (doi:10.3390/biomimetics6020025), 2021-04-02
Supplement: s1 [file s1]

**Table S1.** List of peltate species among vascular plants. The species are sorted by clade and order/family (alphabetically). Further information shown: distribution, habit, habitat, floristic zone and kingdom, peltation. Abbreviations: in Clade: F (ferns), ANA (ANA grade), MAG (magnoliids), MON (monocots), EUD (eudicots), EUD-C (core eudicots), in Distribution: N (Northern), E (Eastern), S (Southern), W (Western), C (Central), in Habit: h (herbaceous), l (lignified), a (annual), p (perennial), in Habitat: a (aquatic), t (terrestrial), in Floristic kingdom: Hol (Holarctic), Pal (Palaeotropics), Neo (Neotropics), Aus (Australis), Cap (Capensis), Ant (Antarctic), circpol (all continents in the floral zone), in Floral zone: arct (arctic), b (boreal), temp (temperate), sm (submeridional), m (meridional), boreostrop (boreo-subtropical), strop (subtropical), austrostrop (austro-subtropical), trop (tropical), austr (austral), antarct (antarctic), in peltation: e (eccentric), c (central).

| Clade | Order       | Family        | Species                                           | Continent                    | Distribution                                                  | Habit |      | Habitat | Floral zone                          | Floristic kingdom  | Peltation |
|-------|-------------|---------------|---------------------------------------------------|------------------------------|---------------------------------------------------------------|-------|------|---------|--------------------------------------|--------------------|-----------|
| Fern  | Salviniales | Marsileaceae  | <i>Marsilea aegyptiaca</i> Willd.                 | Africa, Asia, Europe         | N Africa, S Africa, Arabian Peninsula, E Russia, China, India | h     | p    | a       | t, sm, m, boreostrop, austrostrop    | Hol, Pal, Cap      | c         |
| Fern  | Salviniales | Marsileaceae  | <i>Marsilea ancylopoda</i> A. Braun               | North America, South America | Tropical America, Subtropical America                         | h     | p    | a       | boreostrop, trop, austrostrop, austr | Neo                | c         |
| Fern  | Salviniales | Marsileaceae  | <i>Marsilea batardae</i> Launert                  | Europe                       | Portugal, Spain                                               | h     | p    | a       | sm, m                                | Hol                | c         |
| Fern  | Salviniales | Marsileaceae  | <i>Marsilea macrocarpa</i> C. Presl               | Africa                       | C Africa, S Africa, Madagascar                                | h     | p    | a       | trop, austrostrop                    | Pal                | c         |
| Fern  | Salviniales | Marsileaceae  | <i>Marsilea oligospora</i> Goodd.                 | North America                | USA                                                           | h     | p    | a       | t, sm, m                             | Hol                | c         |
| Fern  | Salviniales | Marsileaceae  | <i>Marsilea strigosa</i> Willd.                   | Europe                       | Mediterranean region, Russia, Kazakhstan                      | h     | p    | a       | sm                                   | Hol                | c         |
| ANA   | Nymphaeales | Cabombaceae   | <i>Brasenia schreberi</i> J.F.Gmel.               | Africa, South America, Asia  | worldwide                                                     | h     | p    | a       | austr, strop, trop, m, sm, temp      | Hol, Pal, Neo, Aus | c         |
| ANA   | Nymphaeales | Cabombaceae   | <i>Cabomba aquatica</i> Aubl.                     | South America                | South America                                                 | h     | p    | a       | strop, trop                          | Neo                | c         |
| ANA   | Nymphaeales | Nymphaeaceae  | <i>Euryale ferox</i> Salisb. ex K.D.Koenig & Sims | Asia                         | Asia                                                          | h     | a, p | a       | boreostrop, m                        | Pal                | c         |
| ANA   | Nymphaeales | Nymphaeaceae  | <i>Nymphaea colorata</i> Peter                    | Africa                       | Tanzania                                                      | h     | p    | a       | trop                                 | Pal                | e         |
| ANA   | Nymphaeales | Nymphaeaceae  | <i>Nymphaea gigantea</i> Hook.                    | Australia and Oceania        | Australia                                                     | h     | p    | a       | austrostrop                          | Aus                | e         |
| ANA   | Nymphaeales | Nymphaeaceae  | <i>Nymphaea lotus</i> L.                          | Africa                       | Africa                                                        | h     | p    | a       | strop, trop                          | Pal                | e         |
| ANA   | Nymphaeales | Nymphaeaceae  | <i>Victoria amazonica</i> (Poepp.) J.C. Sowerby   | South America                | S America                                                     | h     | p    | a       | trop                                 | Neo                | c         |
| ANA   | Nymphaeales | Nymphaeaceae  | <i>Victoria cruziana</i> Orb.                     | South America                | S America                                                     | h     | p    | a       | austrostrop                          | Neo                | c         |
| MAG   | Laurales    | Hernandiaceae | <i>Hernandia nymphaeifolia</i> (C.Presl) Kubitzki | Asia, Africa                 | SE Asia, Madagascar                                           | l     | p    | t       | trop                                 | Pal                | e         |
| MAG   | Laurales    | Hernandiaceae | <i>Hernandia sonora</i> L.                        | North America                | Mexico, Caribbean                                             | l     | p    | t       | boreostrop                           | Neo                | e         |
| MAG   | Piperales   | Piperaceae    | <i>Peperomia albonervosa</i> G.Mathieu            | South America                | SW Mexico                                                     | h     | p    | t       | boreostrop                           | Neo                | c         |
| MAG   | Piperales   | Piperaceae    | <i>Peperomia argyreia</i> E.Morr.                 | South America                | Brazil                                                        | h     | p    | t       | austrostrop                          | Neo                | e         |
| MAG   | Piperales   | Piperaceae    | <i>Peperomia arifolia</i> Miq.                    | South America                | Argentina, Bolivia, Brazil, Paraguay                          | h     | -    | t       | austr, austrostrop, trop             | Neo                | e         |
| MAG   | Piperales   | Piperaceae    | <i>Peperomia bracteata</i> A.W.Hill               | South America                | Guatemala, Mexico                                             | h     | p    | t       | boreostrop                           | Neo                | c         |
| MAG   | Piperales   | Piperaceae    | <i>Peperomia claytonioides</i> Kunth              | North America                | Mexico, C America                                             | h     | p    | t       | boreostrop                           | Neo                | e         |
| MAG   | Piperales   | Piperaceae    | <i>Peperomia cotyledon</i> Benth.                 | South America                | Colombia, Ecuador                                             | h     | p    | t       | trop                                 | Neo                | e         |
| MAG   | Piperales   | Piperaceae    | <i>Peperomia cyclaminoides</i> A.W. Hill          | South America                | Bolivia                                                       | h     | -    | t       | boreostrop                           | Neo                | c         |
| MAG   | Piperales   | Piperaceae    | <i>Peperomia fugax</i> C. DC.                     | North America                | Mexico                                                        | h     | -    | t       | boreostrop                           | Neo                | e         |
| MAG   | Piperales   | Piperaceae    | <i>Peperomia gracillima</i> S. Watson             | North America                | Mexico                                                        | h     | p    | t       | boreostrop                           | Neo                | c         |
| MAG   | Piperales   | Piperaceae    | <i>Peperomia hernandiifolia</i> (Vahl) A. Dietr.  | North America, South America | C America, S America                                          | h     | p    | t       | strop, trop                          | Neo                | e         |
| MAG   | Piperales   | Piperaceae    | <i>Peperomia macrandra</i> C. DC.                 | South America                | Mexico, Guatemala                                             | h     | -    | t       | boreostrop                           | Neo                | e         |
| MAG   | Piperales   | Piperaceae    | <i>Peperomia monticola</i> Miq.                   | South America                | Mexico                                                        | h     | p    | t       | boreostrop                           | Neo                | e         |
| MAG   | Piperales   | Piperaceae    | <i>Peperomia polybotrya</i> Kunth                 | South America                | S America                                                     | h     | p    | t       | trop                                 | Neo                | e         |
| MAG   | Piperales   | Piperaceae    | <i>Peperomia schizandra</i> Trel.                 | South America                | Mexico                                                        | h     | p    | t       | boreostrop                           | Neo                | c         |
| MAG   | Piperales   | Piperaceae    | <i>Peperomia sodiroi</i> C.DC.                    | South America                | Ecuador                                                       | h     | p    | t       | trop                                 | Neo                | e         |

| Clade | Order       | Family     | Species                                                                   | Continent     | Distribution                                 | Habit |   | Habitat | Floral zone         | Floristic kingdom | Peltation |
|-------|-------------|------------|---------------------------------------------------------------------------|---------------|----------------------------------------------|-------|---|---------|---------------------|-------------------|-----------|
| MAG   | Piperales   | Piperaceae | <i>Peperomia tuerckheimii</i>                                             | North America | C America                                    | h     | - | t       | boreostrop          | Neo               | e         |
| MAG   | Piperales   | Piperaceae | <i>Piper fragile</i> Benth.                                               | Asia          | C Malesia, W Pacific                         | -     | - | t       | trop                | Pal, Aus          | e         |
| MAG   | Piperales   | Piperaceae | <i>Piper peltatifolium</i> C.Y. Hao, H.S. Wu, Y.H. Tan                    | Asia          | China                                        | l     | p | t       | boreostrop          | Pal               | e         |
| MAG   | Piperales   | Piperaceae | <i>Piper peltatum</i> L.                                                  | South America | S America, C America                         | h,l   | - | t       | strop, trop         | Neo               | e         |
| MON   | Alismatales | Araceae    | <i>Alocasia acuminata</i> Schott                                          | Asia          | Bangladesh, China, India, Nepal, SE Asia     | h     | p | t       | boreostrop, trop    | Pal               | e         |
| MON   | Alismatales | Araceae    | <i>Alocasia baginda</i> Kurniawan & P.C. Boyce                            | Asia          | Borneo                                       | h     | p | t       | trop                | Pal               | e         |
| MON   | Alismatales | Araceae    | <i>Alocasia chaili</i> P.C. Boyce                                         | Asia          | Borneo                                       | h     | p | t       | trop                | Pal               | e         |
| MON   | Alismatales | Araceae    | <i>Alocasia cuprea</i> K.Koch                                             | Asia          | Borneo                                       | h     | p | t       | trop                | Pal               | e         |
| MON   | Alismatales | Araceae    | <i>Alocasia fallax</i> Schott                                             | Asia          | Bangladesh, India                            | h     | p | t       | boreostrop          | Pal               | e         |
| MON   | Alismatales | Araceae    | <i>Alocasia fornicata</i> (Kunth) Schott                                  | Asia          | India, Bangladesh, India, Sri Lanka, SE Asia | h     | p | t       | boreostrop, trop    | Pal               | e         |
| MON   | Alismatales | Araceae    | <i>Alocasia infernalis</i> P.C. Boyce                                     | Asia          | Borneo                                       | h     | p | t       | trop                | Pal               | e         |
| MON   | Alismatales | Araceae    | <i>Alocasia longiloba</i> Miq.                                            | Asia          | SE Asia                                      | h     | p | t       | boreostrop, trop    | Pal               | e         |
| MON   | Alismatales | Araceae    | <i>Alocasia melo</i> A. Hay, P.C. Boyce & K.M. Wong                       | Asia          | Borneo                                       | h     | p | t       | trop                | Pal               | e         |
| MON   | Alismatales | Araceae    | <i>Alocasia navicularis</i> (K. Koch & C.D. Bouché) K. Koch & C.D. Bouché | Asia          | Bangladesh, China, India, Nepal, SE Asia     | h     | p | t       | boreostrop, trop    | Pal               | e         |
| MON   | Alismatales | Araceae    | <i>Alocasia peltata</i> M. Hotta                                          | Asia          | Borneo                                       | h     | p | t       | trop                | Pal               | e         |
| MON   | Alismatales | Araceae    | <i>Alocasia perakensis</i> Hemsl.                                         | Asia          | Malaysia, Thailand                           | h     | p | t       | boreostrop, trop    | Pal               | e         |
| MON   | Alismatales | Araceae    | <i>Alocasia reginula</i> A.Hay                                            | Asia          | Borneo                                       | h     | p | t       | trop                | Pal               | e         |
| MON   | Alismatales | Araceae    | <i>Alocasia reversa</i> N.E. Br.                                          | Asia          | Borneo                                       | h     | p | t       | trop                | Pal               | e         |
| MON   | Alismatales | Araceae    | <i>Amorphophallus konjac</i> K.Koch                                       | Asia          | China, SE Asia                               | h     | p | t       | m                   | Hol               | c         |
| MON   | Alismatales | Araceae    | <i>Anthurium forgetii</i> N.E.Br.                                         | South America | Colombia                                     | h     | p | t       | trop                | Neo               | e         |
| MON   | Alismatales | Araceae    | <i>Anthurium jureianum</i> Cath. & Olaió                                  | South America | Brazil                                       | h     | p | t       | austrostrop         | Neo               | e         |
| MON   | Alismatales | Araceae    | <i>Ariopsis peltata</i> Nimmo                                             | Asia          | India                                        | h     | p | t       | boreostrop, trop    | Pal               | e         |
| MON   | Alismatales | Araceae    | <i>Ariopsis proanthera</i> N.E. Br.                                       | Asia          | Bangladesh, India, Myanmar, Nepal, Thailand  | h     | p | t       | boreostrop, trop    | Pal               | e         |
| MON   | Alismatales | Araceae    | <i>Arisaema caudatum</i> Engl.                                            | Asia          | India                                        | h     | p | t       | boreostrop, trop    | Pal               | c         |
| MON   | Alismatales | Araceae    | <i>Arisaema ciliatum</i> H.Li                                             | Asia          | China                                        | h     | p | t       | m                   | Hol               | c         |
| MON   | Alismatales | Araceae    | <i>Arisaema concinnum</i> Schott.                                         | Asia          | Bhutan, China, India, Myanmar, Nepal, Tibet  | h     | p | t       | m, boreostrop, trop | Hol, Pal          | c         |
| MON   | Alismatales | Araceae    | <i>Arisaema fischeri</i> Manudev & Nampy                                  | Asia          | India                                        | h     | p | t       | boreostrop, trop    | Pal               | c         |
| MON   | Alismatales | Araceae    | <i>Arisaema leschenaultii</i> Blume                                       | Asia          | India, Nepal, Sri Lanka                      | h     | p | t       | m, boreostrop, trop | Pal               | e         |
| MON   | Alismatales | Araceae    | <i>Arisaema nilamburens</i> Sivad.                                        | Asia          | India                                        | h     | p | t       | boreostrop, trop    | Pal               | e         |
| MON   | Alismatales | Araceae    | <i>Arisaema peltatum</i> C.E.C. Fisch.                                    | Asia          | India                                        | h     | p | t       | boreostrop, trop    | Pal               | e         |
| MON   | Alismatales | Araceae    | <i>Arisaema subulatum</i> Manudev & Nampy                                 | Asia          | India                                        | h     | p | t       | boreostrop, trop    | Pal               | c         |
| MON   | Alismatales | Araceae    | <i>Caladium bicolor</i> Vent.                                             | South America | C America, S America                         | h     | p | t       | boreostrop, trop    | Neo               | e         |
| MON   | Alismatales | Araceae    | <i>Caladium clavatum</i> Hett., Bogner & J. Boos                          | South America | Ecuador                                      | h     | p | t       | trop                | Neo               | e         |
| MON   | Alismatales | Araceae    | <i>Caladium humboldtii</i> (Raf.) Schott                                  | South America | Brazil, Venezuela                            | h     | p | t       | trop                | Neo               | e         |
| MON   | Alismatales | Araceae    | <i>Caladium smaragdinum</i> K. Koch & C.D. Bouché                         | South America | Colombia, Venezuela                          | h     | p | t       | trop                | Neo               | e         |
| MON   | Alismatales | Araceae    | <i>Caladium steudnerifolium</i> Engl.                                     | South America | Bolivia, Colombia, Ecuador, Peru             | h     | p | t       | trop, austrostrop   | Neo               | e         |
| MON   | Alismatales | Araceae    | <i>Caladium steyermarkii</i> G.S. Bunting                                 | South America | Venezuela                                    | h     | p | t       | trop                | Neo               | e         |
| MON   | Alismatales | Araceae    | <i>Colocasia affinis</i> Schott                                           | Asia          | Bangladesh, China, Myanmar, Nepal            | h     | p | t       | boreostrop, m       | Pal               | e         |

| Clade | Order        | Family         | Species                                                 | Continent                           | Distribution                            | Habit |   | Habitat | Floral zone                   | Floristic kingdom | Peltation |
|-------|--------------|----------------|---------------------------------------------------------|-------------------------------------|-----------------------------------------|-------|---|---------|-------------------------------|-------------------|-----------|
| MON   | Alismatales  | Araceae        | <i>Colocasia boyceana</i> Gogoi & Borah                 | Asia                                | India                                   | h     | p | t       | boreostrop, trop              | Pal               | e         |
| MON   | Alismatales  | Araceae        | <i>Colocasia esculenta</i> (L.) Schott                  | Asia                                | SE Asia                                 | h     | p | t       | trop, boreostrop, m           | Pal               | e         |
| MON   | Alismatales  | Araceae        | <i>Colocasia fallax</i> Schott                          | Asia                                | SE Asia                                 | h     | p | t       | m, boreostrop                 | Pal               | e         |
| MON   | Alismatales  | Araceae        | <i>Colocasia hassanii</i> H. Ara                        | Asia                                | Bangladesh                              | h     | p | t       | boreostrop                    | Pal               | e         |
| MON   | Alismatales  | Araceae        | <i>Colocasia lihengiae</i> C.L. Long & K.M. Liu         | Asia                                | Bangladesh, China, India, Vietnam       | h     | p | t       | boreostrop, trop              | Pal               | e         |
| MON   | Alismatales  | Araceae        | <i>Colocasia mannii</i> Hook. f.                        | Asia                                | India, Bangladesh                       | h     | p | t       | boreostrop                    | Pal               | e         |
| MON   | Alismatales  | Araceae        | <i>Colocasia mengalensis</i> J.T. Yin & H. Li & Z.F. Xu | Asia                                | China, Laos, Myanmar, Thailand, Vietnam | h     | p | t       | m, boreostrop, trop           | Pal               | e         |
| MON   | Alismatales  | Araceae        | <i>Colocasia oresbia</i> A. Hay                         | Asia                                | Bangladesh, Borneo, India               | h     | p | t       | boreostrop, trop              | Pal               | e         |
| MON   | Alismatales  | Araceae        | <i>Remusatia hookeriana</i> Schott                      | Asia                                | China, India, Myanmar, Nepal, Thailand  | h     | p | t       | m, boreostrop, trop           | Hol, Pal          | e         |
| MON   | Alismatales  | Araceae        | <i>Remusatia pumila</i> (D.Don) H.Li & A.Hay            | Asia                                | China, Bangladesh, Nepal, Thailand      | h     | p | t       | boreostrop                    | Pal               | e         |
| MON   | Alismatales  | Araceae        | <i>Remusatia vivipara</i> (Roxb.) Schott                | Africa, Asia, Australia and Oceania | Africa , Australia, SE Asia             | h     | p | t       | strop, trop                   | Pal, Aus          | e         |
| MON   | Alismatales  | Araceae        | <i>Remusatia yunnanensis</i> (H. Li & A. Hay) A. Hay    | Asia                                | China, Taiwan                           | h     | p | t       | m, boreostrop                 | Hol, Pal          | e         |
| MON   | Alismatales  | Araceae        | <i>Steudnera assamica</i> Hook. f.                      | Asia                                | India                                   | h     | p | t       | boreostrop                    | Pal               | e         |
| MON   | Alismatales  | Araceae        | <i>Steudnera capitellata</i> Hook. f.                   | Asia                                | Myanmar                                 | h     | p | t       | boreostrop                    | Pal               | e         |
| MON   | Alismatales  | Araceae        | <i>Steudnera colocasiifolia</i> K.Koch                  | Asia                                | SE Asia, China                          | h     | p | t       | m, boreostrop                 | Hol, Pal          | e         |
| MON   | Alismatales  | Araceae        | <i>Steudnera colocasioides</i> Hook. f.                 | Asia                                | Bangladesh, India, Myanmar              | h     | p | t       | boreostrop, trop              | Pal               | e         |
| MON   | Alismatales  | Araceae        | <i>Steudnera discolor</i> W. Bull                       | Asia                                | India, Bangladesh, Myanmar, Thailand    | h     | p | t       | boreostrop                    | Pal               | e         |
| MON   | Alismatales  | Araceae        | <i>Steudnera griffithii</i> (Schott) Hook. f.           | Asia                                | China, India, Myanmar                   | h     | p | t       | m, boreostrop, trop           | Hol, Pal          | e         |
| MON   | Alismatales  | Araceae        | <i>Steudnera henryana</i> Engl.                         | Asia                                | China, Laos, Vietnam                    | h     | p | t       | m, boreostrop, trop           | Hol, Pal          | e         |
| MON   | Alismatales  | Araceae        | <i>Steudnera kerrii</i> Gagnep.                         | Asia                                | China, Laos, Thailand, Vietnam          | h     | p | t       | boreostrop                    | Pal               | e         |
| MON   | Alismatales  | Araceae        | <i>Steudnera virosa</i> (Roxb.) Prain                   | Asia                                | Bangladesh, India                       | h     | p | t       | boreostrop, trop              | Pal               | e         |
| MON   | Alismatales  | Araceae        | <i>Xanthosoma peltatum</i> G.S. Bunting                 | South America                       | Venezuela                               | h     | p | t       | trop                          | Neo               | e         |
| EUD   | Proteales    | Nelumbonaceae  | <i>Nelumbo lutea</i> Willd.                             | North America                       | S USA                                   | h     | p | a       | boreostrop, m                 | Hol               | c         |
| EUD   | Proteales    | Nelumbonaceae  | <i>Nelumbo nucifera</i> Gaertn.                         | Asia                                | India                                   | h     | p | a       | boreostrop                    | Pal               | c         |
| EUD   | Ranunculales | Berberidaceae  | <i>Podophyllum aurantiocaula</i> Hand.-Mazz.            | Asia                                | China                                   | h     | p | t       | m                             | Hol               | c         |
| EUD   | Ranunculales | Berberidaceae  | <i>Podophyllum delavayi</i> Franch.                     | Asia                                | China                                   | h     | p | t       | m                             | Hol               | e         |
| EUD   | Ranunculales | Berberidaceae  | <i>Podophyllum difforme</i> Hemsl. & E.H.Wilson         | Asia                                | China, Vietnam                          | h     | p | t       | m, boreostrop                 | Hol, Pal          | c         |
| EUD   | Ranunculales | Berberidaceae  | <i>Podophyllum glaucescens</i> J.M.H.Shaw               | Asia                                | China                                   | h     | p | t       | m                             | Hol               | e         |
| EUD   | Ranunculales | Berberidaceae  | <i>Podophyllum hemsleyi</i> J.M.H. Shaw & Stearn        | Asia                                | China                                   | h     | p | t       | m, boreostrop                 | Hol, Pal          | c         |
| EUD   | Ranunculales | Berberidaceae  | <i>Podophyllum peltatum</i> L.                          | North America                       | N America                               | h     | p | t       | b, temp, sm, m                | Hol               | c         |
| EUD   | Ranunculales | Berberidaceae  | <i>Podophyllum pleianthum</i> Hance                     | Asia                                | China, Taiwan                           | h     | p | t       | m                             | Hol               | c         |
| EUD   | Ranunculales | Berberidaceae  | <i>Podophyllum versipelle</i> Hance                     | Asia                                | China, Vietnam                          | h     | p | t       | boreostrop                    | Pal               | c         |
| EUD   | Ranunculales | Menispermaceae | <i>Cissampelos glaberrima</i> A. St.-Hil.               | South America                       | Tropical S America                      | h,l   | p | t       | trop, austrostrop             | Neo               | e         |
| EUD   | Ranunculales | Menispermaceae | <i>Cissampelos grandifolia</i> Triana & Planch.         | North America, South America        | C America, Tropical S America           | h,l   | p | t       | boreostrop, trop, austrostrop | Neo               | e         |
| EUD   | Ranunculales | Menispermaceae | <i>Cissampelos hispida</i> Forman                       | Asia                                | Thailand                                | l     | p | t       | boreostrop, trop              | Pal               | e         |
| EUD   | Ranunculales | Menispermaceae | <i>Cissampelos owariensis</i> P. Beauv. ex DC.          | Africa                              | Tropical Africa                         | h,l   | p | t       | boreostrop, trop              | Pal               | e         |

| Clade | Order        | Family         | Species                                                    | Continent                   | Distribution                                             | Habit |   | Habitat | Floral zone                   | Floristic kingdom | Peltation |
|-------|--------------|----------------|------------------------------------------------------------|-----------------------------|----------------------------------------------------------|-------|---|---------|-------------------------------|-------------------|-----------|
| EUD   | Ranunculales | Menispermaceae | <i>Cissampelos rigidifolia</i> (Engl.) Diels               | Africa                      | C African Republic, Sudan, Tanzania, Uganda, Zambia      | l     | p | t       | boreostrop, trop, austrostrop | Pal               | e         |
| EUD   | Ranunculales | Menispermaceae | <i>Cissampelos sympodialis</i> Eichler                     | South America               | Brazil                                                   | h,l   | p | t       | trop, austrostrop             | Neo               | e         |
| EUD   | Ranunculales | Menispermaceae | <i>Cosciniium blumeianum</i> Miers ex Hook.f. & Thomson    | Asia                        | Malaysia, Thailand, Vietnam                              | l     | p | t       | boreostrop, trop              | Pal               | e         |
| EUD   | Ranunculales | Menispermaceae | <i>Cyclea cauliflora</i> Merr.                             | Asia                        | Philippines, Sulawesi                                    | h,l   | p | t       | boreostrop, trop              | Pal               | e         |
| EUD   | Ranunculales | Menispermaceae | <i>Cyclea debiliflora</i> Miers                            | Asia                        | China, India, Vietnam                                    | h,l   | p | t       | m, boreostrop, trop           | Pal               | e         |
| EUD   | Ranunculales | Menispermaceae | <i>Cyclea fissicalyx</i> Dunn                              | Asia                        | India                                                    | h,l   | p | t       | boreostrop, trop              | Pal               | e         |
| EUD   | Ranunculales | Menispermaceae | <i>Cyclea hypoglauca</i> (Schauer) Diels                   | Asia                        | China, Vietnam                                           | h,l   | p | t       | m, boreostrop, trop           | Pal               | e         |
| EUD   | Ranunculales | Menispermaceae | <i>Cyclea laxiflora</i> Miers                              | Asia                        | Borneo, Malaysia, Sumatra, Tahiland                      | h,l   | p | t       | boreostrop, trop              | Pal               | e         |
| EUD   | Ranunculales | Menispermaceae | <i>Cyclea peltata</i> (Lam.) Hook. f. & Thomson            | Asia                        | SE Asia, India                                           | h,l   | p | t       | boreostrop                    | Pal               | e         |
| EUD   | Ranunculales | Menispermaceae | <i>Cyclea varians</i> Craib                                | Asia                        | Thailand                                                 | h,l   | p | t       | boreostrop, trop              | Pal               | e         |
| EUD   | Ranunculales | Menispermaceae | <i>Disciphania calocarpa</i> Standl.                       | North America               | C America                                                | l     | p | t       | boreostrop                    | Neo               | e         |
| EUD   | Ranunculales | Menispermaceae | <i>Disciphania contraversa</i> Barneby                     | South America               | Brazil                                                   | -     | p | t       | austrostrop                   | Neo               | e         |
| EUD   | Ranunculales | Menispermaceae | <i>Disciphania hernandia</i> (Vell.) Barneby               | South America               | Brazil                                                   | h, l  | p | t       | trop, austrostrop             | Neo               | e         |
| EUD   | Ranunculales | Menispermaceae | <i>Menispermum dauricum</i> DC.                            | Asia                        | China, Mongolia, Russia, Japan, Korea                    | h, l  | p | t       | b, temp, sm, m, boreostrop    | Hol, Pal          | e         |
| EUD   | Ranunculales | Menispermaceae | <i>Perichasma laetificata</i> Miers                        | Africa                      | midwest Africa                                           | -     | p | t       | trop                          | Pal               | e         |
| EUD   | Ranunculales | Menispermaceae | <i>Stephania abyssinica</i> (Quart.-Dill. & A.Rich.) Walp. | Africa                      | Africa                                                   | h     | p | t       | strop, trop                   | Pal               | e         |
| EUD   | Ranunculales | Menispermaceae | <i>Stephania brevipes</i> Craib                            | Asia                        | Thailand, Vietnam                                        | h     | p | t       | boreostrop, trop              | Pal               | e         |
| EUD   | Ranunculales | Menispermaceae | <i>Stephania capitata</i> (Blume) Spreng.                  | Asia                        | Borneo, Jawa, Sunda Islands, Malaysia, Sumatra, Thailand | h     | p | t       | boreostrop, trop              | Pal               | e         |
| EUD   | Ranunculales | Menispermaceae | <i>Stephania delavayi</i> Diels                            | Asia                        | China, Myanmar                                           | h     | p | t       | boreostrop                    | Pal               | e         |
| EUD   | Ranunculales | Menispermaceae | <i>Stephania formanii</i> Kundu & S. Guha                  | Australia and Oceania       | New Guinea                                               | h     | p | t       | trop                          | Pal               | e         |
| EUD   | Ranunculales | Menispermaceae | <i>Stephania japonica</i> (Thunb.) Miers                   | Asia, Australia and Oceania | Tropical Asia, Subtropical Asia, Australia               | h     | p | t       | boreostrop, trop, austrostrop | Pal, Aus          | e         |
| EUD   | Ranunculales | Menispermaceae | <i>Stephania oblata</i> Craib                              | Asia                        | Thailand, Cambodia                                       | h     | p | t       | boreostrop, trop              | Pal               | e         |
| EUD   | Ranunculales | Menispermaceae | <i>Stephania pierrei</i> Diels                             | Asia                        | Cambodia, Laos, Thailand, Vietnam                        | h     | p | t       | boreostrop, trop              | Pal               | e         |
| EUD   | Ranunculales | Menispermaceae | <i>Stephania rotunda</i> Lour.                             | Asia                        | India, Western SE Asia                                   | h     | p | t       | boreostrop, trop              | Pal               | e         |
| EUD   | Ranunculales | Menispermaceae | <i>Stephania suberosa</i> Forman                           | Asia                        | Cambodia, Thailand                                       | h     | p | t       | trop                          | Pal               | e         |
| EUD   | Ranunculales | Menispermaceae | <i>Stephania venosa</i> Spreng.                            | Asia                        | SE Asia                                                  | h     | p | t       | boreostrop, trop              | Pal               | e         |
| EUD   | Ranunculales | Ranunculaceae  | <i>Peltocalathos baurii</i> (MacOwan) Tamura               | Africa                      | South Africa, Lesotho, Eswatini                          | h     | p | t       | austr                         | Cap               | c         |
| EUD   | Ranunculales | Ranunculaceae  | <i>Ranunculus clypeatus</i> (Ulbr.) Lourteig               | South America               | Peru                                                     | h     | p | t       | trop                          | Neo               | e         |
| EUD   | Ranunculales | Ranunculaceae  | <i>Ranunculus lyallii</i> Hook.f.                          | Australia and Oceania       | New Zealand                                              | h     | p | t       | austr                         | Ant               | c         |
| EUD   | Ranunculales | Ranunculaceae  | <i>Thalictrum ichangense</i> Lecoy. ex Oliv.               | Asia                        | China, Korea, Vietnam                                    | h     | p | t       | boreostrop, m                 | Hol, Pal          | e         |
| EUD   | Ranunculales | Ranunculaceae  | <i>Thalictrum pringlei</i> S. Watson                       | North America               | Mexico                                                   | h     | p | t       | boreostrop                    | Neo               | e         |
| EUD   | Ranunculales | Ranunculaceae  | <i>Thalictrum pseudoichangense</i> Q.E. Yang & G.H. Zhu    | Asia                        | China                                                    | h     | p | t       | m, boreostrop                 | Hol, Pal          | e         |
| EUD   | Ranunculales | Ranunculaceae  | <i>Thalictrum roseanum</i> B.Boivin                        | North America               | Mexico                                                   | h     | p | t       | boreostrop                    | Neo               | e         |
| EUD   | Ranunculales | Ranunculaceae  | <i>Asteropyrum cavaleriei</i> H.Lév. & Vaniot              | Asia                        | China                                                    | h     | p | t       | m                             | Hol               | e         |
| EUD   | Ranunculales | Ranunculaceae  | <i>Asteropyrum peltatum</i> (Franch.) J.R.Drumm. & Hutch.  | Asia                        | China, Myanmar                                           | h     | p | t       | boreostrop                    | Pal               | e         |
| EUD-C | Apiales      | Apiaceae       | <i>Klotzschia brasiliensis</i> Cham.                       | South America               | Brazil                                                   | h     | - | t       | austrostrop                   | Neo               | e         |

| Clade | Order       | Family        | Species                                                    | Continent                            | Distribution                                          | Habit |   | Habitat | Floral zone              | Floristic kingdom | Peltation |
|-------|-------------|---------------|------------------------------------------------------------|--------------------------------------|-------------------------------------------------------|-------|---|---------|--------------------------|-------------------|-----------|
| EUD-C | Apiales     | Apiaceae      | <i>Klotzschia glaziovii</i> Urb.                           | South America                        | Brazil                                                | l     | p | t       | austrostrop              | Neo               | e         |
| EUD-C | Apiales     | Apiaceae      | <i>Klotzschia rhizophylla</i> Urb.                         | South America                        | Brazil                                                | h     | - | t       | austrostrop              | Neo               | e         |
| EUD-C | Apiales     | Apiaceae      | <i>Petagnaea gussonei</i> (Spreng.) Rauschert              | Europe                               | Sicilia                                               | h     | p | t       | m                        | Hol               | c         |
| EUD-C | Apiales     | Araliaceae    | <i>Hydrocotyle bonariensis</i> Lam.                        | South America                        | C America, S America                                  | h     | p | t       | boreostrop, trop         | Neo               | c         |
| EUD-C | Apiales     | Araliaceae    | <i>Hydrocotyle pusilla</i> R.Br. ex Rich.                  | South America                        | C America, S America                                  | h     | p | t       | boreostrop, trop         | Neo               | c         |
| EUD-C | Apiales     | Araliaceae    | <i>Hydrocotyle umbellata</i> L.                            | South America                        | C America, S America                                  | h     | p | t       | boreostrop, trop         | Neo               | c         |
| EUD-C | Apiales     | Araliaceae    | <i>Hydrocotyle verticillata</i> Thunb.                     | Africa, South America, North America | N America, S America, S Africa                        | h     | p | a       | strop, trop, m           | Hol, Neo, Pal     | c         |
| EUD-C | Apiales     | Araliaceae    | <i>Hydrocotyle vulgaris</i> L.                             | Europe                               | Europe                                                | h     | p | a       | m, sm, temp, b           | Hol               | c         |
| EUD-C | Apiales     | Araliaceae    | <i>Hydrocotyle yanghuangensis</i> (Hieron.) Mathias        | South America                        | Ecuador                                               | h     | p | t       | trop                     | Neo               | e         |
| EUD-C | Apiales     | Araliaceae    | <i>Oplopanax japonicus</i> Nakai                           | Asia                                 | Japan                                                 | l     | p | t       | t, sm                    | Hol               | e         |
| EUD-C | Apiales     | Araliaceae    | <i>Schefflera actinophylla</i> (Endl.) Harms               | Australia and Oceania                | Australia, New Guinea                                 | l     | p | t       | trop, austrostrop        | Pal, Aus          | e         |
| EUD-C | Apiales     | Araliaceae    | <i>Schefflera arboricola</i> (Hayata) Merr.                | Asia                                 | Taiwan                                                | l     | p | t       | m                        | Hol               | e         |
| EUD-C | Apiales     | Araliaceae    | <i>Schefflera digitata</i> J.R. Forst. & G. Forst.         | Australia and Oceania                | New Zealand                                           | l     | p | t       | austrostrop, austr       | Aus               | e         |
| EUD-C | Asterales   | Asteraceae    | <i>Ligularia nelumbifolia</i> Hand.-Mazz.                  | Asia                                 | China                                                 | h     | p | t       | sm, m, boreostrop        | Hol, Pal          | e         |
| EUD-C | Asterales   | Asteraceae    | <i>Prenanthes subpeltata</i> Stebbins                      | Africa                               | Ethiopia, Kenya, Rwanda, Democratic Republic of Congo | h     | p | t       | boreostrop, trop         | Pal               | e         |
| EUD-C | Asterales   | Asteraceae    | <i>Psacalium laxiflorum</i> Benth.                         | North America                        | Mexico                                                | h     | p | t       | boreostrop               | Neo               | c         |
| EUD-C | Asterales   | Asteraceae    | <i>Psacalium megaphyllum</i> Rydb.                         | North America                        | Mexico                                                | h     | p | t       | boreostrop               | Neo               | e         |
| EUD-C | Asterales   | Asteraceae    | <i>Senecio oxyriifolius</i> DC.                            | Africa                               | C Africa, S Africa                                    | h     | p | t       | austr, austrostrop, trop | Cap, Pal          | e         |
| EUD-C | Asterales   | Asteraceae    | <i>Syneilesis aconitifolia</i> (Bunge) Maxim.              | Asia                                 | China, Japan, Korea, Russia                           | h     | p | t       | t, sm, m, boreostrop     | Hol, Pal          | c         |
| EUD-C | Asterales   | Asteraceae    | <i>Syneilesis palmata</i> (Thunb.) Maxim.                  | Asia                                 | Korea, Japan                                          | h     | p | t       | sm                       | Hol               | c         |
| EUD-C | Asterales   | Asteraceae    | <i>Psacalium pachyphyllum</i> (Sch.Bip.) H.Rob. & Brettell | North America                        | Mexico                                                | h     | p | t       | boreostrop               | Neo               | e         |
| EUD-C | Asterales   | Asteraceae    | <i>Psacalium peltatum</i> Cass.                            | North America                        | Mexico                                                | h     | p | t       | boreostrop               | Neo               | c         |
| EUD-C | Asterales   | Asteraceae    | <i>Psacalium pinetorum</i> (Standl. & Steyerf.) Cuatrec.   | North America                        | Guatemala                                             | h     | p | t       | boreostrop               | Neo               | e         |
| EUD-C | Asterales   | Asteraceae    | <i>Psacalium putlanum</i> B.L. Turner                      | North America                        | Mexico                                                | h     | p | t       | boreostrop               | Neo               | e         |
| EUD-C | Asterales   | Asteraceae    | <i>Roldana chapalensis</i> (S. Watson) H. Rob. & Brettell  | North America                        | Mexico                                                | l     | p | t       | boreostrop               | Neo               | e         |
| EUD-C | Asterales   | Asteraceae    | <i>Roldana heterogama</i> (Benth.) H.Rob. & Brettell       | North America                        | Costa Rica, Guatemala, Mexico, Panama                 | h, l  | p | t       | boreostrop               | Neo               | e         |
| EUD-C | Asterales   | Asteraceae    | <i>Roldana subpeltata</i> (Sch. Bip.) H. Rob. & Brettell   | North America                        | Mexico                                                | h, l  | p | t       | boreostrop               | Neo               | e         |
| EUD-C | Brassicales | Caricaceae    | <i>Jacaratia digitata</i> (Poepp. & Endl.) Solms           | South America                        | Bolivia, Brazil, Ecuador, Venezuela                   | l     | p | t       | strop, trop              | Neo               | e         |
| EUD-C | Brassicales | Caricaceae    | <i>Jacaratia spinosa</i> (Aubl.) A.DC.                     | South America                        | C America, S America                                  | l     | p | t       | strop, trop              | Neo               | e         |
| EUD-C | Brassicales | Tropaeolaceae | <i>Tropaeolum brachyceras</i> Hook. & Arn.                 | South America                        | Chile                                                 | h     | p | t       | austrostrop              | Neo, Ant          | e         |
| EUD-C | Brassicales | Tropaeolaceae | <i>Tropaeolum ciliatum</i> Ruiz & Pav.                     | South America                        | Chile                                                 | h     | p | t       | austrostrop              | Neo, Ant          | e         |
| EUD-C | Brassicales | Tropaeolaceae | <i>Tropaeolum cirrhipes</i> Hook.                          | South America                        | Peru                                                  | h     | - | t       | trop                     | Neo               | e         |
| EUD-C | Brassicales | Tropaeolaceae | <i>Tropaeolum lindenii</i> Wallis                          | South America                        | Colombia, Ecuador                                     | h     | - | t       | trop                     | Neo               | e         |
| EUD-C | Brassicales | Tropaeolaceae | <i>Tropaeolum majus</i> L.                                 | South America                        | Peru                                                  | h     | p | t       | austrostrop              | Neo               | e         |
| EUD-C | Brassicales | Tropaeolaceae | <i>Tropaeolum minus</i> L.                                 | South America                        | Ecuador, Peru                                         | h     | a | t       | austrostrop, trop        | Neo               | e         |
| EUD-C | Brassicales | Tropaeolaceae | <i>Tropaeolum pentagonum</i> Hughes                        | South America                        | Bolivia, Venezuela                                    | h     | - | t       | trop                     | Neo               | e         |



| Clade | Order          | Family        | Species                                             | Continent     | Distribution                               | Habit |   | Habitat | Floral zone                      | Floristic kingdom | Peltation |
|-------|----------------|---------------|-----------------------------------------------------|---------------|--------------------------------------------|-------|---|---------|----------------------------------|-------------------|-----------|
| EUD-C | Brassicales    | Tropaeolaceae | <i>Tropaeolum pentaphyllum</i> Lam.                 | South America | Argentina, Brazil, Paraguay, Uruguay       | h     | p | t       | austro trop                      | Neo               | e         |
| EUD-C | Brassicales    | Tropaeolaceae | <i>Tropaeolum smithii</i> DC.                       | South America | N South America                            | h     | p | t       | strop, trop                      | Neo               | e         |
| EUD-C | Brassicales    | Tropaeolaceae | <i>Tropaeolum stipulatum</i> Buchenau & Sodiro      | South America | Ecuador, Peru                              | h     | - | t       | trop                             | Neo               | e         |
| EUD-C | Brassicales    | Tropaeolaceae | <i>Tropaeolum tuberosum</i> Ruiz & Pav.             | South America | Bolivia, Colombia, Ecuador, Peru           | h     | p | t       | austro trop, trop                | Neo               | e         |
| EUD-C | Caryophyllales | Polygonaceae  | <i>Coccoloba acapulcensis</i> Standl.               | North America | C America                                  | l     | p | t       | boreostrop                       | Neo               | e         |
| EUD-C | Caryophyllales | Polygonaceae  | <i>Coccoloba tiliacea</i> Lindau                    | South America | Argentina, Bolivia                         | l     | p | t       | trop, austro trop, austr         | Neo               | e         |
| EUD-C | Caryophyllales | Polygonaceae  | <i>Persicaria perfoliata</i> (L.) Gross             | Europe, Asia  | Turkey, India, E Asia, SE Asia             | h     | a | t       | b, temp, sm, m, boreostrop, trop | Hol, Pal          | e         |
| EUD-C | Cornales       | Loasaceae     | <i>Nasa peltata</i> (Spruce ex Urb. & Gilg) Weigend | South America | Ecuador, Peru                              | h     | - | t       | trop                             | Neo               | e         |
| EUD-C | Cornales       | Loasaceae     | <i>Nasa peltiphylla</i> (Weigend) Weigend           | South America | Colombia, Ecuador                          | -     | - | t       | trop                             | Neo               | e         |
| EUD-C | Cucurbitales   | Begoniaceae   | <i>Begonia adpressa</i> Sosef                       | Africa        | Cameroon                                   | h     | p | t       | trop                             | Pal               | e         |
| EUD-C | Cucurbitales   | Begoniaceae   | <i>Begonia atroglandulosa</i> Sosef                 | Africa        | Congo, Gabon, Democratic Republic of Congo | h     | p | t       | trop                             | Pal               | e         |
| EUD-C | Cucurbitales   | Begoniaceae   | <i>Begonia caroliniifolia</i> Regel                 | North America | Mexico, Guatemala, Honduras                | h     | p | t       | boreostrop                       | Neo               | c         |
| EUD-C | Cucurbitales   | Begoniaceae   | <i>Begonia clypeifolia</i> Hook. f.                 | Africa        | WC Africa                                  | h     | p | t       | trop                             | Pal               | e         |
| EUD-C | Cucurbitales   | Begoniaceae   | <i>Begonia conchifolia</i> A.Dietr.                 | South America | Costa Rica, El Salvador, Panamá            | h     | p | t       | trop                             | Neo               | e         |
| EUD-C | Cucurbitales   | Begoniaceae   | <i>Begonia dodsonii</i> L.B.Sm. & Wassh.            | South America | Ecuador                                    | h,l   | p | t       | trop                             | Neo               | e         |
| EUD-C | Cucurbitales   | Begoniaceae   | <i>Begonia egregia</i> N.E.Br.                      | South America | Brazil                                     | -     | - | t       | austro trop                      | Neo               | e         |
| EUD-C | Cucurbitales   | Begoniaceae   | <i>Begonia ferramica</i> N.Hallé                    | Africa        | Gabon                                      | h     | p | t       | trop                             | Pal               | e         |
| EUD-C | Cucurbitales   | Begoniaceae   | <i>Begonia geminiflora</i> L.B.Sm. & Wassh.         | South America | Ecuador                                    | -     | - | t       | trop                             | Pal               | e         |
| EUD-C | Cucurbitales   | Begoniaceae   | <i>Begonia goegoensis</i> N.E.Br.                   | Asia          | Sumatra                                    | h     | p | t       | trop                             | Pal               | e         |
| EUD-C | Cucurbitales   | Begoniaceae   | <i>Begonia hitchcockii</i> Immsch.                  | South America | Ecuador                                    | h,l   | p | t       | trop                             | Neo               | e         |
| EUD-C | Cucurbitales   | Begoniaceae   | <i>Begonia josephi</i> A.DC.                        | Asia          | Myanmar, Nepal, Tibet, S China             | h     | p | t       | boreostrop                       | Pal               | e         |
| EUD-C | Cucurbitales   | Begoniaceae   | <i>Begonia kellermannii</i> C.DC.                   | South America | S America                                  | h     | p | t       | trop                             | Neo               | e         |
| EUD-C | Cucurbitales   | Begoniaceae   | <i>Begonia lacunosa</i> Warb.                       | Africa        | Cameroon, Congo, Zaïre                     | h     | p | t       | trop                             | Pal               | e         |
| EUD-C | Cucurbitales   | Begoniaceae   | <i>Begonia lubbersii</i> É.Morren                   | South America | Brazil                                     | h,l   | p | t       | austro trop                      | Neo               | e         |
| EUD-C | Cucurbitales   | Begoniaceae   | <i>Begonia marojejensis</i> Humbert                 | Africa        | Madagascar                                 | -     | - | t       | trop, austro trop                | Pal               | e         |
| EUD-C | Cucurbitales   | Begoniaceae   | <i>Begonia microsperma</i> Warb.                    | Africa        | Cameroon, Equatorial Guinea                | h     | p | t       | trop                             | Pal               | e         |
| EUD-C | Cucurbitales   | Begoniaceae   | <i>Begonia nelumbiifolia</i> Cham. & Schltdl.       | South America | South America                              | h     | p | t       | austro trop                      | Neo               | e         |
| EUD-C | Cucurbitales   | Begoniaceae   | <i>Begonia peltata</i> Otto & Dietr.                | South America | Guatemala, Honduras, Mexico                | h,l   | p | t       | boreostrop                       | Neo               | e         |
| EUD-C | Cucurbitales   | Begoniaceae   | <i>Begonia quadrialata</i> Warb.                    | Africa        | midwest Africa                             | h     | p | t       | trop                             | Pal               | e         |
| EUD-C | Cucurbitales   | Begoniaceae   | <i>Begonia rhizocaulis</i> (Klotzsch) A. DC.        | South America | S America                                  | h     | p | t       | trop                             | Neo               | e         |
| EUD-C | Cucurbitales   | Begoniaceae   | <i>Begonia scapigera</i> Hook.f.                    | Africa        | midwest Africa                             | l     | p | t       | trop                             | Pal               | e         |
| EUD-C | Cucurbitales   | Begoniaceae   | <i>Begonia sudjanae</i> C.-A. Jansson               | Asia          | Sumatra                                    | h     | p | t       | trop                             | Pal               | e         |
| EUD-C | Cucurbitales   | Begoniaceae   | <i>Begonia thiemei</i> C.DC.                        | North America | Mexico, Honduras, Guatemala                | h     | p | t       | boreostrop                       | Neo               | e         |
| EUD-C | Ericales       | Balsaminaceae | <i>Impatiens begonioides</i> Eb. Fisch. & Raheliv.  | Africa        | Madagascar                                 | h     | - | t       | trop, austro trop                | Pal               | e         |
| EUD-C | Fabales        | Fabaceae      | <i>Lupinus albifrons</i> Benth.                     | North America | USA                                        | h,l   | p | t       | sm, m, boreostrop                | Hol               | e         |
| EUD-C | Fabales        | Fabaceae      | <i>Lupinus angustifolius</i> L.                     | Europe        | Mediterranean area                         | h     | a | t       | sm, m                            | Hol, Pal          | e         |
| EUD-C | Fabales        | Fabaceae      | <i>Lupinus arboreus</i> Sims                        | North America | USA                                        | h,l   | p | t       | sm, m                            | Hol               | e         |

| Clade | Order       | Family       | Species                                                                           | Continent                    | Distribution                            | Habit |     | Habitat | Floral zone       | Floristic kingdom | Peltation |
|-------|-------------|--------------|-----------------------------------------------------------------------------------|------------------------------|-----------------------------------------|-------|-----|---------|-------------------|-------------------|-----------|
| EUD-C | Fabales     | Fabaceae     | <i>Lupinus cosentinii</i> Guss.                                                   | Europe                       | Mediterranean area                      | h     | p,a | t       | m                 | Hol               | e         |
| EUD-C | Fabales     | Fabaceae     | <i>Lupinus digitatus</i> Forssk.                                                  | Africa                       | Algeria, Egypt, Libya                   | h     | a   | t       | m, boreostrop     | Hol, Pal          | e         |
| EUD-C | Fabales     | Fabaceae     | <i>Lupinus elegans</i> Kunth                                                      | North America                |                                         | h,l   | p   | t       | boreostrop        | Neo               | e         |
| EUD-C | Fabales     | Fabaceae     | <i>Lupinus gussoneanus</i> J.Agardh                                               | Europe                       | Mediterranean area                      | h     | a   | t       | sm, m             | Hol               | e         |
| EUD-C | Fabales     | Fabaceae     | <i>Lupinus leucophyllus</i> Douglas ex Lindl.                                     | North America                | USA                                     | h     | p   | t       | temp, sm, m       | Hol               | e         |
| EUD-C | Fabales     | Fabaceae     | <i>Lupinus luteus</i> L.                                                          | Europe                       | Italy, Portugal, Spain                  | h     | a   | t       | sm, m             | Hol               | e         |
| EUD-C | Fabales     | Fabaceae     | <i>Lupinus mutabilis</i> Sweet                                                    | South America                | Bolivia, Colombia, Ecuador              | h,l   | p   | t       | trop              | Neo               | e         |
| EUD-C | Fabales     | Fabaceae     | <i>Lupinus palaestinus</i> Boiss.                                                 | Europe                       | Israel, Egypt                           | h     | a   | t       | m, boreostrop     | Hol               | e         |
| EUD-C | Fabales     | Fabaceae     | <i>Lupinus perennis</i> L.                                                        | North America                | USA                                     | h     | p   | t       | b, temp, sm       | Hol               | e         |
| EUD-C | Fabales     | Fabaceae     | <i>Lupinus polyphyllus</i> Lindl.                                                 | North America                | USA                                     | h     | p   | t       | b, temp, sm, m    | Hol               | e         |
| EUD-C | Fabales     | Fabaceae     | <i>Lupinus subcarnosus</i> Hook.                                                  | North America                | USA, Mexico                             | h     | a   | t       | boreostrop        | Hol, Neo          | e         |
| EUD-C | Fabales     | Fabaceae     | <i>Lupinus succulentus</i> Douglas ex K.Koch                                      | North America                | USA, Mexico                             | h     | a   | t       | boreostrop, m     | Hol, Neo          | e         |
| EUD-C | Gentianales | Apocynaceae  | <i>Hoya imbricata</i> Decne.                                                      | Asia                         | Philippines, Sulawesi                   | h     | p   | t       | boreostrop, trop  | Pal               | c         |
| EUD-C | Gentianales | Apocynaceae  | <i>Macropharynx abnorma</i> J.F. Morales, M.E. Endress & Liede                    | South America                | Peru                                    | h, l  | p   | t       | trop              | Neo               | e         |
| EUD-C | Gentianales | Apocynaceae  | <i>Macropharynx colombiana</i> (Woodson) J.F. Morales, M.E. Endress & Liede       | South America                | Colombia, Venezuela                     | h, l  | p   | t       | trop              | Neo               | e         |
| EUD-C | Gentianales | Apocynaceae  | <i>Macropharynx conflictiva</i> (J.F. Morales) J.F. Morales, M.E. Endress & Liede | South America                | Peru                                    | h, l  | p   | t       | trop              | Neo               | e         |
| EUD-C | Gentianales | Apocynaceae  | <i>Macropharynx gigantea</i> (Woodson) J.F. Morales, M.E. Endress & Liede         | South America                | Peru, Bolivia                           | h, l  | p   | t       | trop, austrostrop | Neo               | e         |
| EUD-C | Gentianales | Apocynaceae  | <i>Macropharynx isthmica</i> (Woodson) J.F. Morales, M.E. Endress & Liede         | North America, South America | Colombia, Costa Rica, Panamá, Venezuela | h, l  | p   | t       | boreostrop, trop  | Neo               | e         |
| EUD-C | Gentianales | Apocynaceae  | <i>Macropharynx macrocalyx</i> (Müll. Arg.) J.F. Morales, M.E. Endress & Liede    | South America                | Brazil, Paraguay                        | h, l  | p   | t       | trop, austrostrop | Neo               | e         |
| EUD-C | Gentianales | Apocynaceae  | <i>Macropharynx peltata</i> (Vell.) J.F. Morales, M.E. Endress & Liede            | South America                | Argentina, Brazil, Paraguay             | h, l  | p   | t       | trop, austrostrop | Neo               | e         |
| EUD-C | Gentianales | Apocynaceae  | <i>Macropharynx peruviana</i> (Woodson) J.F. Morales, M.E. Endress & Liede        | South America                | Peru                                    | h, l  | p   | t       | trop              | Neo               | e         |
| EUD-C | Gentianales | Apocynaceae  | <i>Macropharynx pulchra</i> (Miers) J.F. Morales, M.E. Endress & Liede            | South America                | Brazil                                  | h, l  | p   | t       | trop, austrostrop | Neo               | e         |
| EUD-C | Gentianales | Apocynaceae  | <i>Macropharynx venusta</i> (J.F. Morales) J.F. Morales, M.E. Endress & Liede     | South America                | Ecuador                                 | h, l  | p   | t       | trop              | Neo               | e         |
| EUD-C | Gunnerales  | Gunneraceae  | <i>Gunnera antioquiensis</i> L.E. Mora                                            | South America                | Colombia                                | h     | p   | t       | trop              | Neo               | e         |
| EUD-C | Gunnerales  | Gunneraceae  | <i>Gunnera brephogea</i> Linden & André                                           | South America                | Colombia, Ecuador, Peru                 | h     | p   | t       | trop              | Neo               | c         |
| EUD-C | Gunnerales  | Gunneraceae  | <i>Gunnera peltata</i> Phil.                                                      | South America                | Juan Fernández Is.                      | h     | p   | t       | austr             | Ant               | c         |
| EUD-C | Gunnerales  | Gunneraceae  | <i>Gunnera quitoensis</i> L.E. Mora                                               | South America                | Ecuador                                 | h     | p   | t       | trop              | Neo               | e         |
| EUD-C | Gunnerales  | Gunneraceae  | <i>Gunnera silvioana</i> L.E. Mora                                                | South America                | Colombia, Ecuador                       | h     | p   | t       | trop              | Neo               | e         |
| EUD-C | Lamiales    | Gesneriaceae | <i>Cyrtandra toviana</i> F. Br.                                                   | Australia and Oceania        | Marquesas                               | l     | p   | t       | trop              | Pal               | e         |
| EUD-C | Lamiales    | Gesneriaceae | <i>Cyrtandra wawrae</i> C.B. Clarke                                               | Australia and Oceania        | Hawaii                                  | -     | -   | t       | trop              | Pal               | e         |
| EUD-C | Lamiales    | Gesneriaceae | <i>Drymonia peltata</i> (Oliv.) H.E. Moore                                        | North America                | Costa Rica                              | -     | -   | t       | boreostrop        | Neo               | e         |
| EUD-C | Lamiales    | Gesneriaceae | <i>Metapetrocosmea peltata</i> (Merr. & Chun) W.T. Wand                           | Asia                         | China                                   | h     | p   | t       | boreostrop        | Pal               | e         |
| EUD-C | Lamiales    | Gesneriaceae | <i>Paraboea peltifolia</i> D. Fang & L. Zeng                                      | Asia                         | China                                   | h     | p   | t       | m, boreostrop     | Hol, Pal          | e         |
| EUD-C | Lamiales    | Gesneriaceae | <i>Paraboea yunfuensis</i> F. Wen & Y.G. Wie                                      | Asia                         | China                                   | h     | p   | t       | m, boreostrop     | Hol, Pal          | e         |
| EUD-C | Lamiales    | Gesneriaceae | <i>Petrocosmea huanjiangensis</i> Yan Liu & W.B. Xu                               | Asia                         | China                                   | h     | p   | t       | m, boreostrop     | Hol, Pal          | e         |
| EUD-C | Lamiales    | Gesneriaceae | <i>Petrocosmea pubescens</i> D.J. Middleton & Triboun                             | Asia                         | Thailand                                | h     | p   | t       | boreostrop, trop  | Pal               | e         |

| Clade | Order        | Family           | Species                                                                            | Continent                    | Distribution                             | Habit |      | Habitat | Floral zone         | Floristic kingdom | Peltation |
|-------|--------------|------------------|------------------------------------------------------------------------------------|------------------------------|------------------------------------------|-------|------|---------|---------------------|-------------------|-----------|
| EUD-C | Lamiales     | Gesneriaceae     | <i>Sinningia tuberosa</i> (Mart.) H.E. Moore                                       | South America                | Brazil                                   | h     | p    | t       | austro trop         | Neo               | e         |
| EUD-C | Lamiales     | Gesneriaceae     | <i>Streptocarpus mandrerensis</i> Humbert                                          | Africa                       | Madagascar                               | h     | -    | t       | trop, austro trop   | Pal               | e         |
| EUD-C | Lamiales     | Gesneriaceae     | <i>Streptocarpus peltatus</i> Randrian., Phillipson, Lowry & Mich. Möller          | Africa                       | Madagascar                               | h     | p    | t       | trop, austro trop   | Pal               | e         |
| EUD-C | Lamiales     | Gesneriaceae     | <i>Trichodrymonia peltatifolia</i> (J.L. Clark & M.M. More) M.M. Mora & J.L. Clark | North America                | Panamá                                   | h     | -    | t       | boreo trop          | Neo               | e         |
| EUD-C | Lamiales     | Lentibulariaceae | <i>Utricularia nelumbifolia</i> Gardn.                                             | South America                | Brazil                                   | h     | p    | a       | austro trop         | Neo               | c         |
| EUD-C | Lamiales     | Lentibulariaceae | <i>Utricularia pubescens</i> Sm.                                                   | Africa, South America, Asia  | S America, Africa, India                 | h     | a    | t       | strop, trop         | Neo, Pal          | c         |
| EUD-C | Malpighiales | Euphorbiaceae    | <i>Endospermum moluccanum</i> (Teijsm. & Binn.) Kurz                               | Asia, Australia and Oceania  | Indonesia, New Guinea, Solomon Islands   | l     | p    | t       | trop                | Pal               | e         |
| EUD-C | Malpighiales | Euphorbiaceae    | <i>Jatropha podagrica</i> Hook.                                                    | South America                | C America                                | h, l  | p    | t       | trop                | Neo               | e         |
| EUD-C | Malpighiales | Euphorbiaceae    | <i>Macaranga bancana</i> (Miq.) Müll.Arg.                                          | Asia                         | Thailand, Malesia                        | l     | p    | t       | boreo trop, trop    | Pal               | e         |
| EUD-C | Malpighiales | Euphorbiaceae    | <i>Macaranga cuspidata</i> Boivin ex Baill.                                        | Africa                       | Madagascar                               | l     | p    | t       | trop, austro trop   | Pal               | e         |
| EUD-C | Malpighiales | Euphorbiaceae    | <i>Macaranga magna</i> Turrill                                                     | Australia and Oceania        | Fiji                                     | l     | p    | t       | austro trop         | Aus               | e         |
| EUD-C | Malpighiales | Euphorbiaceae    | <i>Macaranga tanarius</i> (L.) Mull.Arg.                                           | Asia, Australia and Oceania  | SE Asia, Australia                       | l     | p    | t       | strop, trop         | Pal, Aus          | e         |
| EUD-C | Malpighiales | Euphorbiaceae    | <i>Macaranga thompsonii</i> Merr.                                                  | Asia                         | S Asia                                   | l     | p    | t       | trop                | Pal               | e         |
| EUD-C | Malpighiales | Euphorbiaceae    | <i>Mallotus floribundus</i> (Blume) Müll. Arg.                                     | Asia                         | SE Asia                                  | l     | p    | t       | boreo trop, trop    | Pal               | e         |
| EUD-C | Malpighiales | Euphorbiaceae    | <i>Mallotus lackeyi</i> Elmer                                                      | Asia                         | Borneo, Philippines                      | l     | p    | t       | trop                | Pal               | e         |
| EUD-C | Malpighiales | Euphorbiaceae    | <i>Mallotus peltatus</i> (Geiseler) Müll. Arg.                                     | Asia                         | China, India, SE Asia                    | l     | p    | t       | m, boreo trop, trop | Pal               | e         |
| EUD-C | Malpighiales | Euphorbiaceae    | <i>Mallotus surculosus</i> P.I. Forst.                                             | Australia and Oceania        | Australia                                | l     | p    | t       | austro trop         | Aus               | e         |
| EUD-C | Malpighiales | Euphorbiaceae    | <i>Mallotus thorelii</i> Gagnep.                                                   | Asia                         | Cambodia, China, Laos, Thailand, Vietnam | l     | p    | t       | m, boreo trop, trop | Pal               | e         |
| EUD-C | Malpighiales | Euphorbiaceae    | <i>Manihot fabianae</i> M. Mend.                                                   | South America                | Bolivia                                  | l     | p    | t       | trop, austro trop   | Neo               | e         |
| EUD-C | Malpighiales | Euphorbiaceae    | <i>Manihot mirabilis</i> Pax                                                       | South America                | Paraguay                                 | l     | p    | t       | trop, austro trop   | Neo               | e         |
| EUD-C | Malpighiales | Euphorbiaceae    | <i>Manihot peltata</i> Pohl                                                        | South America                | Brazil                                   | l     | p    | t       | trop, austro trop   | Neo               | e         |
| EUD-C | Malpighiales | Euphorbiaceae    | <i>Megistostigma peltatum</i> (J.J. Sm.) Croizat                                   | Asia                         | Jawa, Sumatra                            | l     | p    | t       | trop                | Pal               | e         |
| EUD-C | Malpighiales | Euphorbiaceae    | <i>Meineckia peltata</i> (Hutch.) G.L. Webster                                     | Africa                       | Madagascar                               | l     | p    | t       | trop, austro trop   | Pal               | e         |
| EUD-C | Malpighiales | Euphorbiaceae    | <i>Ricinus communis</i> L.                                                         | Africa                       | Eritrea, Ethiopia, Somalia               | h, l  | a, p | t       | boreo trop          | Pal               | e         |
| EUD-C | Malpighiales | Euphorbiaceae    | <i>Endospermum peltatum</i> Merr.                                                  | Asia                         | South East Asia                          | l     | p    | t       | trop                | Pal               | e         |
| EUD-C | Malpighiales | Euphorbiaceae    | <i>Homalanthus grandifolius</i> Ridl.                                              | Asia                         | Borneo, Sumatra                          | l     | p    | t       | trop                | Pal               | e         |
| EUD-C | Malpighiales | Euphorbiaceae    | <i>Homalanthus macradenius</i> Pax & K. Hoffm.                                     | Asia                         | Philippines                              | l     | p    | t       | boreo trop, trop    | Pal               | e         |
| EUD-C | Malpighiales | Euphorbiaceae    | <i>Jatropha hernandiifolia</i> Vent.                                               | North America                | Dominican Republic, Haiti, Puerto Rico   | l     | p    | t       | boreo trop          | Neo               | e         |
| EUD-C | Malpighiales | Euphorbiaceae    | <i>Jatropha nudicaulis</i> Benth.                                                  | South America                | Colombia, Ecuador                        | l     | p    | t       | trop                | Neo               | e         |
| EUD-C | Malpighiales | Euphorbiaceae    | <i>Jatropha peltata</i> Sessé                                                      | North America                | Mexico                                   | h, l  | p    | t       | boreo trop          | Neo               | e         |
| EUD-C | Malpighiales | Euphorbiaceae    | <i>Jatropha weberbaueri</i> Pax & K. Hoffm.                                        | South America                | Peru                                     | -     | -    | t       | trop                | Neo               | e         |
| EUD-C | Malpighiales | Passifloraceae   | <i>Adenia penangiana</i> (Wall. ex G. Don) W.J. de Wilde                           | Asia                         | SE Asia                                  | h     | p    | t       | boreo trop, trop    | Pal               | e         |
| EUD-C | Malpighiales | Passifloraceae   | <i>Passiflora coriacea</i> Juss.                                                   | South America                | C America, S America                     | h     | p    | t       | boreo trop, trop    | Neo               | e         |
| EUD-C | Malpighiales | Passifloraceae   | <i>Passiflora guatemalensis</i> S. Watson                                          | North America, South America | C America, Colombia, Venezuela           | h     | p    | t       | boreo trop, trop    | Neo               | e         |
| EUD-C | Malpighiales | Passifloraceae   | <i>Passiflora rubrotincta</i> Killip                                               | South America                | Bolivia                                  | h     | p    | t       | trop, austro trop   | Neo               | e         |
| EUD-C | Malpighiales | Passifloraceae   | <i>Passiflora spectabilis</i> Killip                                               | South America                | Peru                                     | h     | p    | t       | trop                | Neo               | e         |
| EUD-C | Malpighiales | Phyllanthaceae   | <i>Astrocasia peltata</i> Standl.                                                  | North America                | Costa Rica, Mexico                       | l     | p    | t       | boreo trop          | Neo               | e         |
| EUD-C | Malpighiales | Salicaceae       | <i>Xylosma peltata</i> (Sleumer) Lescot                                            | Australia and Oceania        | New Caledonia                            | l     | p    | t       | austro trop         | Aus               | e         |



| Clade | Order      | Family           | Species                                           | Continent                    | Distribution                                | Habit |   | Habitat | Floral zone                      | Floristic kingdom | Peltation |
|-------|------------|------------------|---------------------------------------------------|------------------------------|---------------------------------------------|-------|---|---------|----------------------------------|-------------------|-----------|
| EUD-C | Malvales   | Dipterocarpaceae | <i>Shorea peltata</i> Symington                   | Asia                         | Borneo, Malaysia, Sumatra                   | l     | p | t       | Trop                             | Pal               | e         |
| EUD-C | Malvales   | Malvaceae        | <i>Brownlowia ferruginea</i> Kosterm.             | Asia                         | Borneo                                      | l     | p | t       | trop                             | Pal               | e         |
| EUD-C | Malvales   | Malvaceae        | <i>Brownlowia havilandii</i> Stapf                | Asia                         | Borneo                                      | l     | p | t       | trop                             | Pal               | e         |
| EUD-C | Malvales   | Malvaceae        | <i>Brownlowia helferiana</i> Pierre               | Asia                         | Malaysia, Myanmar, Thailand                 | l     | p | t       | boreostrop, trop                 | Pal               | e         |
| EUD-C | Malvales   | Malvaceae        | <i>Brownlowia peltata</i> Benth.                  | Asia                         | Borneo, Myanmar, Thailand, Vietnam          | l     | p | t       | boreostrop, trop                 | Pal               | e         |
| EUD-C | Malvales   | Malvaceae        | <i>Brownlowia stipulata</i> Kosterm.              | Asia                         | Borneo                                      | l     | p | t       | trop                             | Pal               | e         |
| EUD-C | Malvales   | Malvaceae        | <i>Pterospermum acerifolium</i> (L.) Willd.       | Asia                         | India, SE Asia                              | h     | p | t       | boreostrop, trop                 | Pal               | e         |
| EUD-C | Myrtales   | Melastomataceae  | <i>Catanthera peltata</i> M.P. Nayar              | Asia                         | Borneo                                      | -     | - | t       | trop                             | Pal               | e         |
| EUD-C | Myrtales   | Melastomataceae  | <i>Conostegia peltata</i> (Almeda) Kriebel        | North America                | Panama                                      | l     | p | t       | trop                             | Neo               | e         |
| EUD-C | Myrtales   | Melastomataceae  | <i>Gravesia peltata</i> H. Perrier                | Africa                       | Madagascar                                  | h     | p | t       | trop, austrostrop                | Pal               | e         |
| EUD-C | Myrtales   | Melastomataceae  | <i>Leandra peltata</i> Wurdack                    | South America                | Peru                                        | l     | p | t       | trop                             | Neo               | e         |
| EUD-C | Myrtales   | Melastomataceae  | <i>Phyllagathis beccariana</i> (Cogn.) M.P. Nayar | Asia                         | Borneo                                      | h     | p | t       | trop                             | Pal               | e         |
| EUD-C | Myrtales   | Melastomataceae  | <i>Phyllagathis peltata</i> Stapf ex Ridl.        | Asia                         | Borneo                                      | h     | p | t       | trop                             | Pal               | e         |
| EUD-C | Oxalidales | Oxalidaceae      | <i>Oxalis adenophylla</i> Gillies ex Hook. & Arn. | South America                | Argentina, Chile                            | h     | p | t       | austrostrop, austr               | Neo               | c         |
| EUD-C | Oxalidales | Oxalidaceae      | <i>Oxalis articulata</i> Savigny                  | South America                | Argentina, Brazil, Uruguay                  | h     | p | t       | austrostrop                      | Neo               | c         |
| EUD-C | Oxalidales | Oxalidaceae      | <i>Oxalis bowiei</i> W.T.Aiton ex G.Don           | Africa                       | South Africa                                | h     | p | t       | austr                            | Cap               | c         |
| EUD-C | Oxalidales | Oxalidaceae      | <i>Oxalis carolina</i> J. Suda & Sudová           | Africa                       | South Africa                                | h     | p | t       | austr                            | Cap               | c         |
| EUD-C | Oxalidales | Oxalidaceae      | <i>Oxalis corniculata</i> L.                      | South America                | C America                                   | h     | a | t       | trop                             | Neo               | c         |
| EUD-C | Oxalidales | Oxalidaceae      | <i>Oxalis decaphylla</i> Kunth                    | North America                | Mexico                                      | h     | p | t       | boreostrop                       | Neo               | c         |
| EUD-C | Oxalidales | Oxalidaceae      | <i>Oxalis latifolia</i> Kunth                     | North America, South America | USA, Mexico, C America, N South America     | h     | p | t       | m, boreostrop, trop, austrostrop | Hol, Neo          | c         |
| EUD-C | Oxalidales | Oxalidaceae      | <i>Oxalis leucolepis</i> Diels                    | Asia                         | China, Nepal                                | h     | p | t       | boreostrop, m                    | Pal               | c         |
| EUD-C | Oxalidales | Oxalidaceae      | <i>Oxalis nelsonii</i> (Small) R. Kunth           | North America                | Honduras, Mexico                            | h     | p | t       | boreostrop                       | Neo               | c         |
| EUD-C | Oxalidales | Oxalidaceae      | <i>Oxalis stricta</i> L.                          | Asia, North America          | N America, E Asia                           | h     | a | t       | m, sm, temp                      | Hol               | c         |
| EUD-C | Oxalidales | Oxalidaceae      | <i>Oxalis triangularis</i> A.St.-Hil.             | South America                | S America                                   | h     | p | t       | austrostrop, trop                | Neo               | c         |
| EUD-C | Oxalidales | Oxalidaceae      | <i>Oxalis tuberosa</i> Molina                     | South America                | Argentina, Bolivia, Colombia, Ecuador, Peru | h     | p | t       | trop, austrostrop, austr         | Neo               | c         |
| EUD-C | Rosales    | Moraceae         | <i>Dorstenia belizensis</i> C.C. Berg             | North America                | Belize                                      | h     | p | t       | boreostrop                       | Neo               | e         |
| EUD-C | Rosales    | Moraceae         | <i>Dorstenia erythrandra</i> C. Wright ex Griseb. | North America                | Cuba, Dominican Republic, Haiti             | h     | p | t       | boreostrop                       | Neo               | e         |
| EUD-C | Rosales    | Moraceae         | <i>Dorstenia flagellifera</i> Urb. & Ekman        | North America                | Haiti                                       | h     | p | t       | boreostrop                       | Neo               | e         |
| EUD-C | Rosales    | Moraceae         | <i>Dorstenia jamaicensis</i> Britton              | North America                | Jamaica                                     | h     | p | t       | boreostrop                       | Neo               | e         |
| EUD-C | Rosales    | Moraceae         | <i>Dorstenia nummularia</i> Urb. & Ekman          | North America                | Cuba                                        | h     | p | t       | boreostrop                       | Neo               | e         |
| EUD-C | Rosales    | Moraceae         | <i>Dorstenia peltata</i> Spreng.                  | North America                | Cuba, Dominican Republic                    | h     | p | t       | boreostrop                       | Neo               | e         |
| EUD-C | Rosales    | Moraceae         | <i>Dorstenia petrae</i> C. Wright ex Griseb.      | North America                | Cuba                                        | h     | p | t       | boreostrop                       | Neo               | e         |
| EUD-C | Rosales    | Moraceae         | <i>Dorstenia roigii</i> Britton                   | North America                | Cuba                                        | h     | p | t       | boreostrop                       | Neo               | e         |
| EUD-C | Rosales    | Urticaceae       | <i>Cecropia albicans</i> Trécil                   | South America                | Peru                                        | l     | p | t       | trop                             | Neo               | e         |
| EUD-C | Rosales    | Urticaceae       | <i>Cecropia distachya</i> Huber                   | South America                | N South America                             | l     | p | t       | trop, austrostrop                | Neo               | e         |
| EUD-C | Rosales    | Urticaceae       | <i>Cecropia elongata</i> Rusby                    | South America                | Bolivia                                     | l     | p | t       | trop, austrostrop                | Neo               | e         |
| EUD-C | Rosales    | Urticaceae       | <i>Cecropia ficifolia</i> Warb. ex Snethl.        | South America                | N South America                             | l     | p | t       | trop, austrostrop                | Neo               | e         |
| EUD-C | Rosales    | Urticaceae       | <i>Cecropia latiloba</i> Miq.                     | South America                | N South America                             | l     | p | t       | trop, austrostrop                | Neo               | e         |
| EUD-C | Rosales    | Urticaceae       | <i>Cecropia obtusifolia</i> Bertol.               | North America, South America | C America, Colombia, Ecuador                | l     | p | t       | boreostrop, trop                 | Neo               | e         |

| Clade | Order        | Family         | Species                                                     | Continent                   | Distribution                             | Habit |   | Habitat | Floral zone              | Floristic kingdom | Peltation |
|-------|--------------|----------------|-------------------------------------------------------------|-----------------------------|------------------------------------------|-------|---|---------|--------------------------|-------------------|-----------|
| EUD-C | Rosales      | Urticaceae     | <i>Cecropia palmata</i> Willd.                              | South America               | N South America                          | l     | p | t       | trop, austro trop        | Neo               | e         |
| EUD-C | Rosales      | Urticaceae     | <i>Cecropia peltata</i> L.                                  | South America               | C America                                | l     | p | t       | boreotrop, trop          | Neo               | e         |
| EUD-C | Rosales      | Urticaceae     | <i>Cecropia virgusa</i> Cuatrec.                            | South America               | Colombia, Ecuador, Panamá                | l     | p | t       | boreotrop, trop          | Neo               | e         |
| EUD-C | Rosales      | Urticaceae     | <i>Dendrocnide moroides</i> (Wedd.) Chew                    | Asia, Australia and Oceania | Australia, Lesser Sunda Islands, Vanuatu | l     | p | t       | trop, austro trop, austr | Pal, Aus          | e         |
| EUD-C | Rosales      | Urticaceae     | <i>Dendrocnide peltata</i> (Blume) Miq.                     | Asia, Australia and Oceania | New Guinea, Malesia                      | l     | p | t       | trop                     | Pal               | e         |
| EUD-C | Rosales      | Urticaceae     | <i>Elatostema muluense</i> Rodda & A.K. Monro               | Asia                        | Borneo                                   | h     | p | t       | trop                     | Pal               | e         |
| EUD-C | Rosales      | Urticaceae     | <i>Elatostema peltifolium</i> (Ridl.) H.J.P. Winkl.         | Australia and Oceania       | New Guinea                               | h     | - | t       | trop                     | Pal               | e         |
| EUD-C | Rosales      | Urticaceae     | <i>Musanga cecropioides</i> R. Br. ex Tedlie                | Africa                      | W and C Africa                           | l     | p | t       | trop                     | Pal               | c         |
| EUD-C | Rosales      | Urticaceae     | <i>Musanga leo-errerae</i> Hauman & J. Léonard              | Africa                      | C Africa                                 | l     | p | t       | trop                     | Pal               | c         |
| EUD-C | Rosales      | Urticaceae     | <i>Pilea nonggangensis</i> Y.G. Wei, L.F. Fu & A.K. Monro   | Asia                        | China                                    | h     | p | t       | m, boreotrop             | Hol, Pal          | e         |
| EUD-C | Rosales      | Urticaceae     | <i>Pilea panzhihuaensis</i> C.J. Chen, A.K. Monro & L. Chen | Asia                        | China                                    | h     | p | t       | m, boreotrop             | Hol, Pal          | e         |
| EUD-C | Rosales      | Urticaceae     | <i>Pilea peltata</i> Hance                                  | Asia                        | China, Vietnam                           | h     | p | t       | m, boreotrop, trop       | Hol, Pal          | e         |
| EUD-C | Rosales      | Urticaceae     | <i>Pilea peperomioides</i> Diels                            | Asia                        | China                                    | h     | p | t       | m                        | Hol               | e         |
| EUD-C | Rosales      | Rosaceae       | <i>Rubus peltatus</i> Maxim.                                | Asia                        | China, Japan                             | h     | p | t       | sm                       | Hol               | e         |
| EUD-C | Saxifragales | Crassulaceae   | <i>Kalanchoe beharensis</i> Drake                           | Africa                      | Madagascar                               | h     | p | t       | trop, austro trop        | Pal               | e         |
| EUD-C | Saxifragales | Crassulaceae   | <i>Kalanchoe nyikae</i> Engl.                               | Africa                      | Kenya, Tanzania                          | h     | p | t       | trop                     | Pal               | e         |
| EUD-C | Saxifragales | Crassulaceae   | <i>Umbilicus botryoides</i> Hochst. ex A.Rich.              | Africa                      | Africa                                   | h     | p | t       | boreotrop, trop          | Pal               | c         |
| EUD-C | Saxifragales | Crassulaceae   | <i>Umbilicus horizontalis</i> DC.                           | Africa, Europe              | S Europe, N Africa                       | h     | p | t       | m                        | Hol               | c         |
| EUD-C | Saxifragales | Crassulaceae   | <i>Umbilicus luteus</i> Webb & Berthel.                     | Europe                      | Mediterranean region                     | h     | p | t       | m, sm                    | Hol               | c         |
| EUD-C | Saxifragales | Crassulaceae   | <i>Umbilicus rupestris</i> (Salisb.) Dandy                  | Africa, Europe              | Europe, Africa                           | h     | p | t       | m, sm                    | Hol               | c         |
| EUD-C | Saxifragales | Saxifragaceae  | <i>Astilboides tabularis</i> Engl.                          | Asia                        | China                                    | h     | p | t       | sm, temp                 | Hol               | c         |
| EUD-C | Saxifragales | Saxifragaceae  | <i>Chrysosplenium peltatum</i> Turcz.                       | Asia                        | Mongolia, Russia                         | h     | p | t       | t, sm, m                 | Hol               | e         |
| EUD-C | Saxifragales | Saxifragaceae  | <i>Darmera peltata</i> (Torr.) Voss                         | North America               | USA                                      | h     | p | t       | m                        | Hol               | c         |
| EUD-C | Saxifragales | Saxifragaceae  | <i>Peltoboykinia tellimoides</i> (Maxim.) H. Hara           | Asia                        | China, Japan                             | h     | p | t       | t, sm, m                 | Hol, Pal          | e         |
| EUD-C | Saxifragales | Saxifragaceae  | <i>Peltoboykinia watanabei</i> (Yatabe) H. Hara             | Asia                        | Japan                                    | h     | p | t       | t, sm, m                 | Hol               | e         |
| EUD-C | Saxifragales | Saxifragaceae  | <i>Rodgersia aesculifolia</i> Batalin                       | Asia                        | China, Mongolia                          | h     | p | t       | sm, m, boreotrop         | Hol, Pal          | c         |
| EUD-C | Saxifragales | Saxifragaceae  | <i>Rodgersia podophylla</i> A.Gray                          | Asia                        | Japan, Korea                             | h     | p | t       | sm                       | Hol               | c         |
| EUD-C | Solanales    | Convolvulaceae | <i>Decalobanthus elmeri</i> (Merr.) A.R. Simoes & Staples   | Asia                        | Borneo                                   | l     | p | t       | trop                     | Neo               | e         |
| EUD-C | Solanales    | Convolvulaceae | <i>Decalobanthus peltatus</i> (L.) A.R. Simoes & Staples    | Asia, Australia and Oceania | SE Asia, Australia, Madagascar           | l     | p | t       | trop, austro trop        | Pal, Aus          | e         |
| EUD-C | Solanales    | Solanaceae     | <i>Nothocestrum peltatum</i> Skotts.                        | Australia and Oceania       | Hawaii                                   | l     | p | t       | trop                     | Pal               | e         |
