# Supplementary material for: Strengthening Structures in the Petiole–Lamina Junction of Peltate Leaves
Source: Biomimetics (Basel). 2021 Apr 2;6(2):25. doi: 10.3390/biomimetics6020025 (PMC8167582; doi:10.3390/biomimetics6020025)
Supplement: Supplementary file 1 [file biomimetics-06-00025-s001.zip]

Archive with 11 entries (11 files):
- Document S1.pdf
- Figure S1.tif
- Figure S2.tif
- Figure S3.tif
- Figure S4.tif
- Figure S5.tif
- Figure S6.tif
- Figure S7.tif
- Figure S8.tif
- Figure S9.tif
- Table S1.pdf
